# Supplementary material for: Cytochrome c-promoted cardiolipin oxidation generates singlet molecular oxygen
Source: Royal Society of Chemistry journal article supplement (doi:10.1039/c2pp25119a), 2012-07-04
Supplement: c2pp25119a.pdf [file c2pp25119a.pdf]

# Photochemical & Photobiological Sciences

## **Cytochrome c-promoted cardiolipin oxidation generates singlet molecular oxygen**

**Sayuri Miyamoto,<sup>\*a</sup> Iseli L. Nantes,<sup>b</sup> Priscila Faria,<sup>b</sup> Daniela C. Bataglioli,<sup>a</sup> Graziela E. Ronsein,<sup>a</sup> Marisa H. G. Medeiros,<sup>a</sup> and Paolo Di Mascio<sup>\*a</sup>**

<sup>a</sup> Departamento de Bioquímica, Instituto de Química, Universidade de São Paulo, CP26077, CEP 05513-970, São Paulo, SP, Brazil.

<sup>b</sup> Centro de Ciências Naturais e Humanas, Universidade Federal do ABC, Rua Santa Adélia 166, Bairro Bangu, CEP 09210-170, Santo André, SP, Brazil.

\*Email: miyamoto@iq.usp.br; pdmascio@iq.usp.br

**Electronic Supplementary Information**

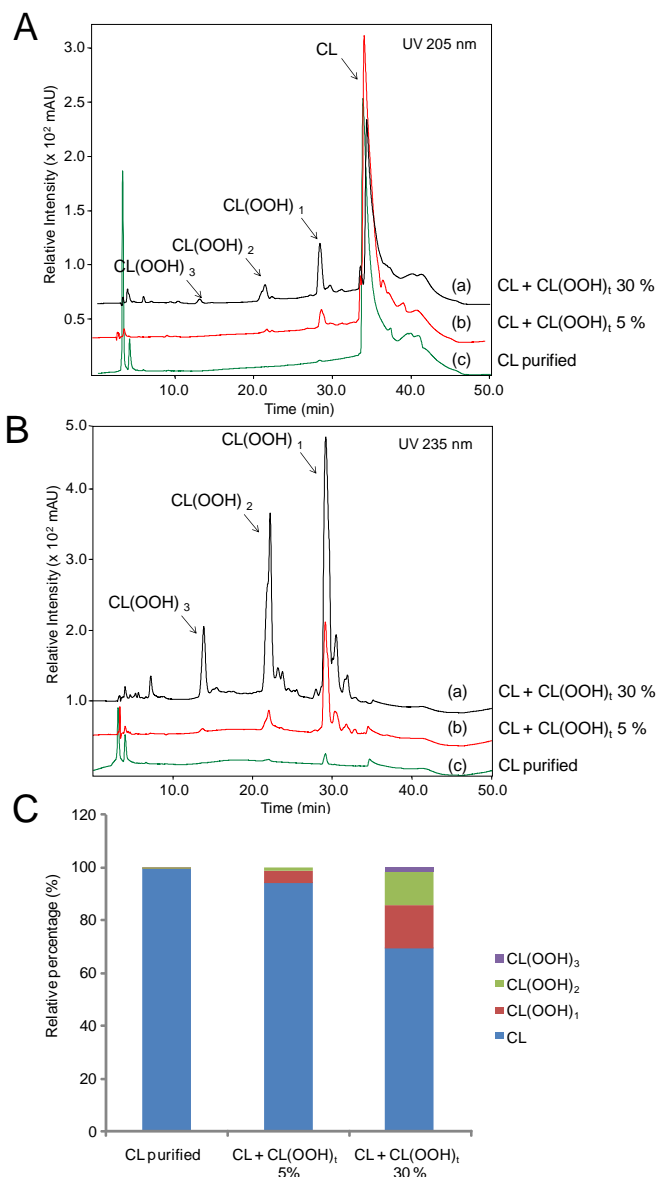

**Figure S1.** Analysis of CL hydroperoxide content in CL stock solutions. An aliquot of 5  $\mu$ l of CL stock solutions [(a) containing 30 % CLOOH; (b) containing 5 % CLOOH; and (c) purified CL] was injected into a HPLC system. The eluent was monitored at 205 nm for CL analysis (A) and at 235 nm for CL(OOH)<sub>1</sub>, CL(OOH)<sub>2</sub> and CL(OOH)<sub>3</sub> analysis (B). The peaks corresponding to each compound was integrated and concentrations (mM) were calculated using the following standard curves: CL ( $y=7 \times 10^6 x + 525102$ ,  $R^2=0,9961$ ), CL(OOH)<sub>1</sub> ( $y=5 \times 10^6 x + 5809$ ,  $R^2=0,9996$ ), CL(OOH)<sub>2</sub> ( $y=4 \times 10^6 x - 23605$ ,  $R^2=0,9911$ ) and CL(OOH)<sub>3</sub> ( $y=1 \times 10^7 x + 12704$ ,  $R^2=0,9726$ ). Pure CL hydroperoxide standards were prepared by photooxidation using methylene blue as a photosensitizer and purified by HPLC using the same condition described for CLOOH analysis.

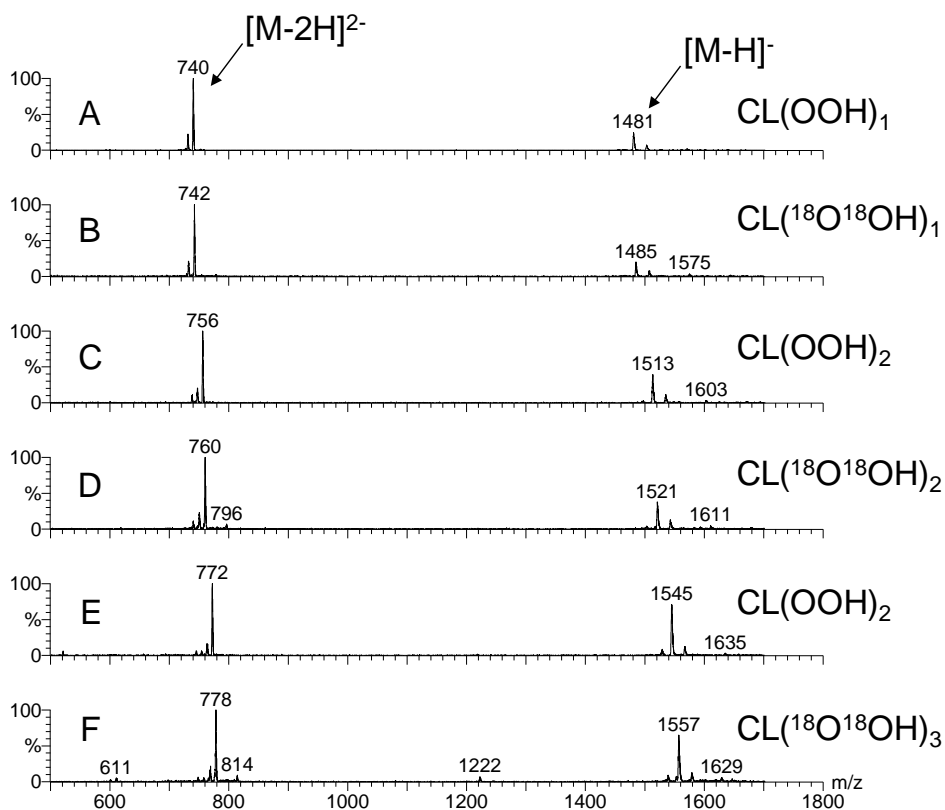

**Figure S2.** Analysis of unlabeled and <sup>18</sup>O-labeled cardiolipin hydroperoxides by HPLC-MS using electrospray ionization in the negative ion mode. The source temperature was set to 150 °C and the cone voltage was set to 35 V. Aliquots (10 μl) of purified cardiolipin hydroperoxides (150 – 300 μM) were injected to the HPLC-MS. CL(OOH)<sub>1</sub> (A), CL(<sup>18</sup>O<sup>18</sup>OH)<sub>1</sub> (B), CL(OOH)<sub>2</sub> (C), CL(<sup>18</sup>O<sup>18</sup>OH)<sub>2</sub> (D), CL(OOH)<sub>3</sub> (E) and CL(<sup>18</sup>O<sup>18</sup>OH)<sub>3</sub> (F).

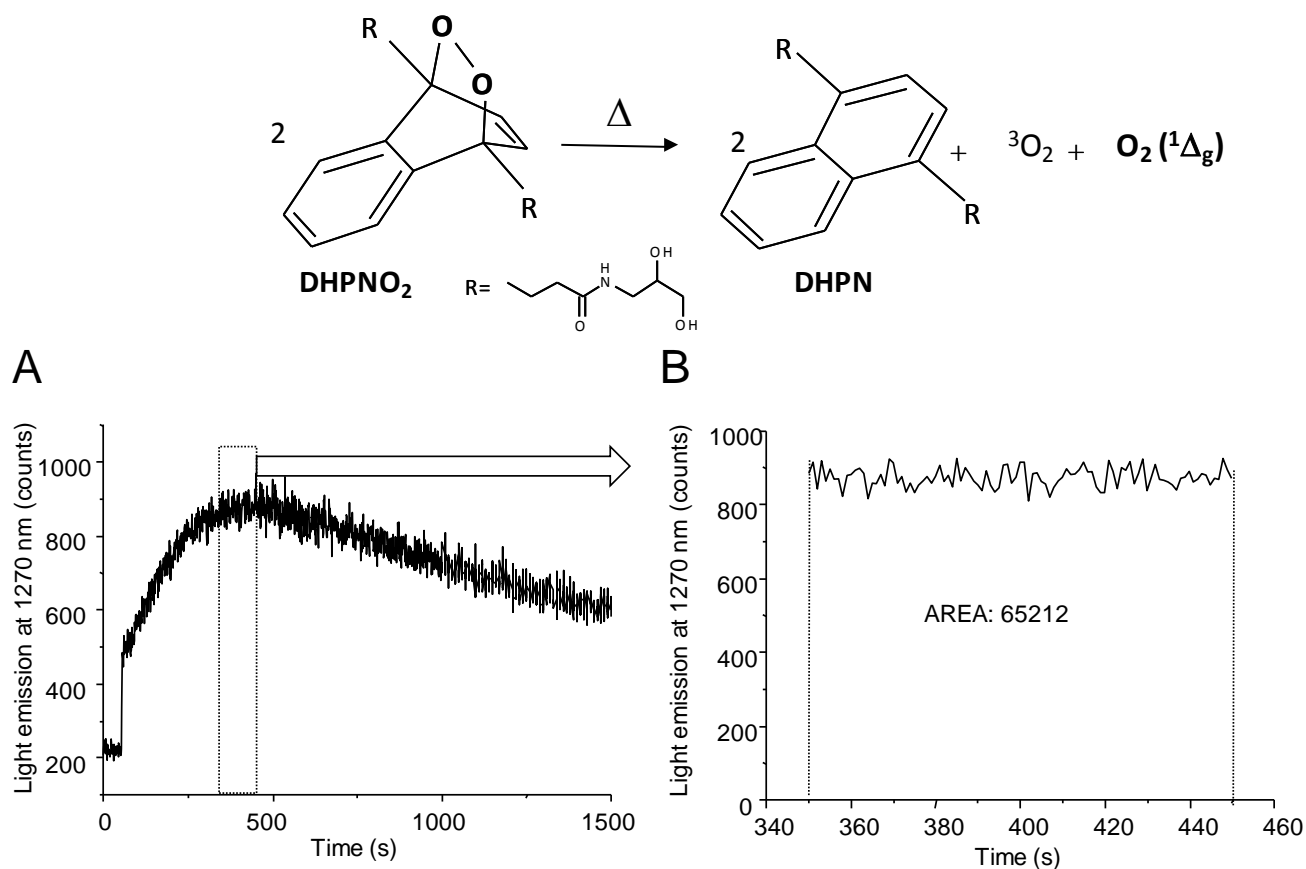

**Figure S3.** Singlet oxygen monomolecular light emission at 1270 nm observed for DHPNO<sub>2</sub>. A) Light emission recorded for DHPNO<sub>2</sub> (6.3 mM) thermolysis in D<sub>2</sub>O at 37°C. B) Expanded view of the emission signal obtained in the period between 350 – 450 s. The area under the emission signal was integrated and correlated to the amount of singlet oxygen generated. Thermolysis of this endoperoxide yields 59% of singlet oxygen at  $5.02 \times 10^{-4} \text{ s}^{-1}$ . Considering that thermolysis of a 6.3 mM solution of DHPNO<sub>2</sub> at 37 °C yields  $1.9 \mu\text{M s}^{-1}$  of singlet oxygen, the integrated area (65212) corresponds to 190  $\mu\text{M}$  of singlet oxygen. This correlation was used to convert the emission signal to singlet oxygen concentrations.

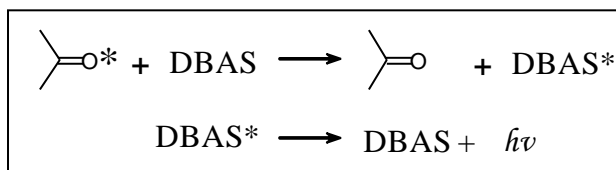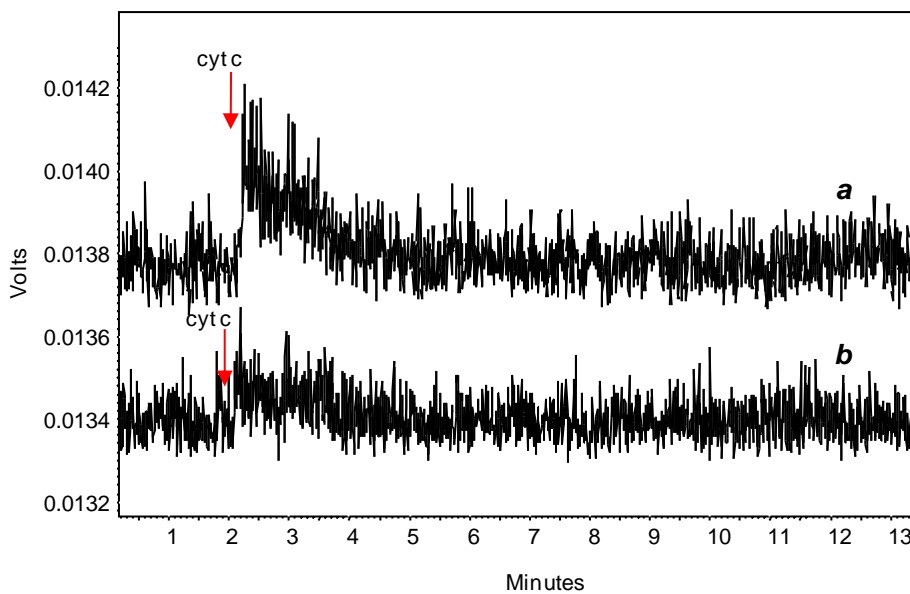

**Figure S4.** Visible light emission in the reaction of cyt c (50  $\mu\text{M}$ ) with liposomes containing DMPC:CL (1.7 mM:1.7 mM in 10 mM deuterated phosphate buffer, pH 7.4) in the presence (a) and absence (b) of 9,10-dibromoanthracene sulphonate, DBAS (14  $\mu\text{M}$ ).
